# Supplementary material
Source: Oxford University Press journal article supplement (https://oup.silverchair-cdn.com/oup/backfile/Content_public/Journal/ije/44/2/10.1093/ije/dyv071/2/dyv071-IJE-2014-04-0474_R2_Supplementary_Tables.doc)
Supplement: Supplementary file 1 [file dyv071-IJE-2014-04-0474_R2_Supplementary_Tables.doc]

**Supplementary Table 1 Exposures and genetic instruments used .**

| Exposure | Number of studies | Genes in which variation was used as an instrument |
| --- | --- | --- |
| C-reactive protein | 29 | *CRP,1-28 LEPR,13,14 HNF1A,7,14 IL6R,7,14,24 APOE7,14, genetic risk score29* |
| BMI/ fat mass/ percentage body fat | 25 | *FTO,8,12,30-45 MC4R,12,32,37-39,41,43,44 TMEM18,32,37,38,44 VEGFA, 46genetic risk score47-52* |
| Alcohol use | 12 | *ALDH2,53-58 ADH1B,59-63 ADH1C61,64* |
| Vitamin D levels | 10 | *GC,65-69 DHCR7/NADSYN1,65-67,70 CYP2R1,65-67,70 CYP24A1,66,67 FLG,68,71 VDR,72 genetic risk scores47,73* |
| Homocysteïne | 8 | *MTHFR74-81* |
| “Folate metabolism” | 4 | *MTHFR82-85* |
| LDL-cholesterol | 8 | *SORT1,86 PCSK9,86-89 LDLR,86-88,90 HMGCR,86 ABCG8,86,89 APOE,86,88,89,91 APOB,87,88 genetic risk score24,92* |
| HDL-cholesterol | 5 | *LIPC,87,93 LIPG94, ABCA1,87 LCAT,95 genetic risk score92,94* |
| Total cholesterol | 4 | *APOE91,96-98* |
| Remnant cholesterol | 3 | *APOA5,87,99 TRIB1,87 GCKR87, genetic risk score24* |
| Remnant cholesterol:HDL ratio | 1 | *LPL87* |
| Triglycerides | 5 | *APOA5,99-101 genetic risk score92,102* |
| Lipoprotein(a) | 7 | *LPA103-109* |
| Lp-PLA2 (activity) | 4 | *PLA2G7,15,110,111 PLA2G2A112* |
| ApoAI | 1 | *APOA5-A4-C3-A115* |
| ApoB | 1 | *APOB15* |
| Uric acid | 7 | *SLC2A9,32,37,49,113-115 ABCG2,113,115 SLC17A1,115 SLC22A11,115 SLC22A12,115 genetic risk score116* |
| IL-6/ IL-6 receptor signalling | 5 | *IL6,117,118 IL6R26,119,120* |
| Fetuin-A | 4 | *AHSG35,121-123* |
| Adiponectin | 4 | *ADIPOQ124-127* |
| Fibrinogen | 4 | *FIBA-B-G cluster,15 FGB128-130* |
| Fasting glucose | 3 | *genetic risk score50,131,132* |
| HOMA-IR | 2 | *GCKR,125 ADAMTS9,133 PPARG2133* |
| Beta-cell function | 2 | *ADAMTS9,133 TCF7L2134* |
| Non-fasting glucose | 1 | *GCK,135 G6PC2,135 ADCY5,135 DGKB,135 ADRA2A135* |
| Fasting insulin | 1 | *INSR,136 IRS1136* |
| Type 2 diabetes | 2 | *genetic risk score131,137* |
| Type 1 diabetes | 1 | *genetic risk score137* |
| Milk consumption | 3 | *LCT138-140* |
| Iron status (ferritin/serum iron) | 3 | *HFE,141,142 TMPRSS6141,143* |
| Bilirubin | 3 | *UGT1A1144-146* |
| SHBG | 3 | *SHBG147-149* |
| Testosterone | 2 | *SHBG,150 FAM9B,150 CYP19A1,151 ESR2151* |
| Prenatal testosterone exposure | 1 | *Sex of co-twin152* |
| Caffeine (intake) | 2 | *CYP1A2,153,154 NAT2,154 GSTA1154* |
| Vitamin B-12 | 2 | *FUT2,155,156 TCN2,155 CUBN156* |
| Total transcobalamin | 1 | *TCN2156* |
| Smoking | 2 | *CHRNA5–CHRNA3–CHRNB4 cluster157,158* |
| PAI-1 levels | 2 | *PAI14G/5G26,78* |
| Malaria infection | 2 | HbAS phenotype159,160 |
| IL-18 | 2 | *IL1826,161* |
| Macrophage migration inhibitory factor | 2 | *MIF26,162* |
| 6-propylthyouracil tasting | 1 | *TAS2R38163* |
| Monocyte chemotactic protein-1 | 1 | *CCL21* |
| Leukocyte telomere length | 1 | *genetic risk score164* |
| Triacylglycerol | 1 | *genetic risk score50* |
| sPLA2-IIa | 1 | *PLA2G2A165* |
| γ-glutamyltransferase | 1 | *GGT1166* |
| Δ5-desaturase and Δ6-desaturase activity | 1 | *FADS1167* |
| Monocyte CD36 expression | 1 | *CD36168* |
| Factor VII | 1 | *F715* |
| Retinol-binding protein 4 | 1 | *RBP4169* |
| Complement factor H | 1 | *CFH170* |
| Surfactant protein D | 1 | *SP-D171* |
| MiR-34b | 1 | *Pri-miR-34b/c172* |
| ICAM-1 | 1 | *ICAM1173* |
| P-selectin | 1 | *SELP173* |
| CSF ApoE | 1 | *APOE,174 genetic risk score174* |
| NT-pro-BNP | 1 | *BNP175* |
| APC resistance | 1 | *FVL78* |
| ACE activity | 1 | *ACE D/I78* |
| Prothrombin levels | 1 | *F278* |
| Beta-carotene | 1 | *BCMO1176* |
| Arsenic metabolism efficiency | 1 | *AS3MT177* |
| IL-1RA | 1 | *IL1RN26* |
| Inflammatory/auto-immune disease | 1 | *IL23R, PTPN2, PTPN22, SH2B3, IL2RA (+ 31 others)26* |
| Ceruloplasmin | 1 | *CP178* |
| Organophosphate exposure | 1 | *PON1179* |

**Supplementary Table 2 Type of genetic instrument in the instrumental variable studies**

| Type of genetic instrument | 1 Study population | Refs | >1 Study population* | Refs |
| --- | --- | --- | --- | --- |
| Single SNP/allele | 27 | 8,19,23,31-36,46,49,53,54,74,93,105,114,122,123,125,142,146,158,160,161,163,166 | 16 | 16,24,30,37,57,81,91,94,95,103,109,112,117,134,136,175 |
| Multiple SNPs in separate analyses | 6 | 13,39,66,126,153,156 | 12 | 14,68,86,87,89,107,108,133,135,141,148,174 |
| Multiple SNPs in a single analysis | 11 | 13,39,41,43,61,65,83,121,150,156,164 | 14 | 37,68,71,87-89,108,124,133,135,148,151,173,177 |
| Combinations of SNPs, e.g. haplotypes | 6 | 10,17-20,22 | 10 | 3,5,6,9,11,24,27,28,99,130 |
| Genetic risk score/allele score etc. | 8 | 32,48-51,66,105,126,164 | 11 | 7,24,38,44,47,87,92,94,102,115,174 |
| Repeats | 0 | - | 4 | 104,106-108 |

Abbreviations: SNP single nucleotide polymorphism.

The total number of types of genetic instrument exceeds the total number of studies (49 in 1 study population, 52 in >1 study population) because some studies used multiple types of genetic instrument.

Reference List

1 Alegret JM, Aragonès G, Elosua R, et al. The relevance of the association between inflammation and atrial fibrillation. Eur J Clin Invest 2013 Apr;43(4):324-31.

2 Rius-Ottenheim N, de Craen AJ, Geleijnse JM, et al. C-reactive protein haplotypes and dispositional optimism in obese and nonobese elderly subjects. Inflamm Res 2012 Jan;61(1):43-51.

3 Wensley F, Gao P, Burgess S, et al. Association between C reactive protein and coronary heart disease: mendelian randomisation analysis based on individual participant data. BMJ 2011;342:d548.

4 Bolton CE, Schumacher W, Cockcroft JR, et al. The CRP genotype, serum levels and lung function in men: the Caerphilly Prospective Study. Clin Sci (Lond) 2011 Apr;120(8):347-55.

5 Dahl M, Vestbo J, Zacho J, Lange P, Tybjærg-Hansen A, Nordestgaard BG. C reactive protein and chronic obstructive pulmonary disease: a Mendelian randomisation approach. Thorax 2011 Mar;66(3):197-204.

6 Marott SC, Nordestgaard BG, Zacho J, et al. Does elevated C-reactive protein increase atrial fibrillation risk? A Mendelian randomization of 47,000 individuals from the general population. J Am Coll Cardiol 2010 Aug 31;56(10):789-95.

7 Heikkilä K, Silander K, Salomaa V, et al. C-reactive protein-associated genetic variants and cancer risk: findings from FINRISK 1992, FINRISK 1997 and Health 2000 studies. Eur J Cancer 2011 Feb;47(3):404-12.

8 Timpson NJ, Nordestgaard BG, Harbord RM, et al. C-reactive protein levels and body mass index: elucidating direction of causation through reciprocal Mendelian randomization. Int J Obes (Lond) 2011 Feb;35(2):300-8.

9 Zacho J, Tybjærg-Hansen A, Nordestgaard BG. C-reactive protein and risk of venous thromboembolism in the general population. Arterioscler Thromb Vasc Biol 2010 Aug;30(8):1672-8.

10 Zacho J, Tybjærg-Hansen A, Nordestgaard BG. C-reactive protein and all-cause mortality--the Copenhagen City Heart Study. Eur Heart J 2010 Jul;31(13):1624-32.

11 Allin KH, Nordestgaard BG, Zacho J, Tybjærg-Hansen A, Bojesen SE. C-reactive protein and the risk of cancer: a mendelian randomization study. J Natl Cancer Inst 2010 Feb 3;102(3):202-6.

12 Welsh P, Polisecki E, Robertson M, et al. Unraveling the directional link between adiposity and inflammation: a bidirectional Mendelian randomization approach. J Clin Endocrinol Metab 2010 Jan;95(1):93-9.

13 Bochud M, Marquant F, Marques-Vidal PM, et al. Association between C-reactive protein and adiposity in women. J Clin Endocrinol Metab 2009 Oct;94(10):3969-77.

14 Elliott P, Chambers JC, Zhang W, et al. Genetic Loci associated with C-reactive protein levels and risk of coronary heart disease. JAMA 2009 Jul 1;302(1):37-48.

15 Drenos F, Talmud PJ, Casas JP, et al. Integrated associations of genotypes with multiple blood biomarkers linked to coronary heart disease risk. Hum Mol Genet 2009 Jun 15;18(12):2305-16.

16 Lawlor DA, Harbord RM, Timpson NJ, et al. The association of C-reactive protein and CRP genotype with coronary heart disease: findings from five studies with 4,610 cases amongst 18,637 participants. PLoS One 2008;3(8):e3011.

17 Kivimäki M, Lawlor DA, Davey Smith G, et al. Does high C-reactive protein concentration increase atherosclerosis? The Whitehall II Study. PLoS One 2008;3(8):e3013.

18 Brunner EJ, Kivimäki M, Witte DR, et al. Inflammation, insulin resistance, and diabetes--Mendelian randomization using CRP haplotypes points upstream. PLoS Med 2008 Aug 12;5(8):e155.

19 Sunyer J, Pistelli R, Plana E, et al. Systemic inflammation, genetic susceptibility and lung function. Eur Respir J 2008 Jul;32(1):92-7.

20 Viikari LA, Huupponen RK, Viikari JS, et al. Relationship between leptin and C-reactive protein in young Finnish adults. J Clin Endocrinol Metab 2007 Dec;92(12):4753-8.

21 Casas JP, Shah T, Cooper J, et al. Insight into the nature of the CRP-coronary event association using Mendelian randomization. Int J Epidemiol 2006 Aug;35(4):922-31.

22 Timpson NJ, Lawlor DA, Harbord RM, et al. C-reactive protein and its role in metabolic syndrome: mendelian randomisation study. Lancet 2005 Dec 3;366(9501):1954-9.

23 Davey Smith G, Lawlor DA, Harbord R, et al. Association of C-reactive protein with blood pressure and hypertension: life course confounding and mendelian randomization tests of causality. Arterioscler Thromb Vasc Biol 2005 May;25(5):1051-6.

24 Varbo A, Benn M, Tybjærg-Hansen A, Nordestgaard BG. Elevated remnant cholesterol causes both low-grade inflammation and ischemic heart disease, whereas elevated low-density lipoprotein cholesterol causes ischemic heart disease without inflammation. Circulation 2013 Sep 17;128(12):1298-309.

25 Veen G, Giltay EJ, Van Vliet IM, et al. C-reactive protein polymorphisms are associated with the cortisol awakening response in basal conditions in human subjects. Stress 2011 Mar;14(2):128-35.

26 Rafiq S, Melzer D, Weedon MN, et al. Gene variants influencing measures of inflammation or predisposing to autoimmune and inflammatory diseases are not associated with the risk of type 2 diabetes. Diabetologia 2008 Dec;51(12):2205-13.

27 Wium-Andersen MK, Orsted DD, Nordestgaard BG. Elevated C-reactive protein, depression, somatic diseases, and all-cause mortality: a mendelian randomization study. Biol Psychiatry 2014 Aug 1;76(3):249-57.

28 Wium-Andersen MK, Orsted DD, Nordestgaard BG. Elevated C-reactive protein associated with late- and very-late-onset schizophrenia in the general population: a prospective study. Schizophr Bull 2014 Sep;40(5):1117-27.

29 Oei L, Campos-Obando N, Dehghan A, et al. Dissecting the relationship between high-sensitivity serum C-reactive protein and increased fracture risk: the Rotterdam Study. Osteoporos Int 2014 Apr;25(4):1247-54.

30 Fall T, Hagg S, Magi R, et al. The role of adiposity in cardiometabolic traits: a Mendelian randomization analysis. PLoS Med 2013;10(6):e1001474.

31 Warodomwichit D, Sritara C, Thakkinstian A, et al. Causal inference of the effect of adiposity on bone mineral density in adults. Clin Endocrinol (Oxf) 2013 May;78(5):694-9.

32 Lyngdoh T, Vuistiner P, Marques-Vidal P, et al. Serum uric acid and adiposity: deciphering causality using a bidirectional Mendelian randomization approach. PLoS One 2012;7(6):e39321.

33 Kivimäki M, Jokela M, Hamer M, et al. Examining overweight and obesity as risk factors for common mental disorders using fat mass and obesity-associated (FTO) genotype-instrumented analysis: The Whitehall II Study, 1985-2004. Am J Epidemiol 2011 Feb 15;173(4):421-9.

34 Lawlor DA, Timpson NJ, Harbord RM, et al. Exploring the developmental overnutrition hypothesis using parental-offspring associations and FTO as an instrumental variable. PLoS Med 2008 Mar 11;5(3):e33.

35 Thakkinstian A, Chailurkit L, Warodomwichit D, et al. Causal relationship between body mass index and fetuin-A level in the asian population: a bidirectional mendelian randomization study. Clin Endocrinol (Oxf) 2014 Aug;81(2):197-203.

36 Kivimäki M, Davey Smith G, Timpson NJ, et al. Lifetime body mass index and later atherosclerosis risk in young adults: examining causal links using Mendelian randomization in the Cardiovascular Risk in Young Finns study. Eur Heart J 2008 Oct;29(20):2552-60.

37 Palmer TM, Nordestgaard BG, Benn M, et al. Association of plasma uric acid with ischaemic heart disease and blood pressure: mendelian randomisation analysis of two large cohorts. BMJ 2013;347:f4262.

38 Nordestgaard BG, Palmer TM, Benn M, et al. The effect of elevated body mass index on ischemic heart disease risk: causal estimates from a Mendelian randomisation approach. PLoS Med 2012;9(5):e1001212.

39 Lawlor DA, Harbord RM, Tybjærg-Hansen A, et al. Using genetic loci to understand the relationship between adiposity and psychological distress: a Mendelian Randomization study in the Copenhagen General Population Study of 53,221 adults. J Intern Med 2011 May;269(5):525-37.

40 Brennan P, McKay J, Moore L, et al. Obesity and cancer: Mendelian randomization approach utilizing the FTO genotype. Int J Epidemiol 2009 Aug;38(4):971-5.

41 Timpson NJ, Harbord R, Davey Smith G, Zacho J, Tybjærg-Hansen A, Nordestgaard BG. Does greater adiposity increase blood pressure and hypertension risk?: Mendelian randomization using the FTO/MC4R genotype. Hypertension 2009 Jul;54(1):84-90.

42 Lim LS, Tai ES, Aung T, et al. Relation of age-related cataract with obesity and obesity genes in an Asian population. Am J Epidemiol 2009 May 15;169(10):1267-74.

43 Timpson NJ, Sayers A, Davey Smith G, Tobias JH. How does body fat influence bone mass in childhood? A Mendelian randomization approach. J Bone Miner Res 2009 Mar;24(3):522-33.

44 Stender S, Nordestgaard BG, Tybjærg-Hansen A. Elevated body mass index as a causal risk factor for symptomatic gallstone disease: a Mendelian randomization study. Hepatology 2013 Dec;58(6):2133-41.

45 Panoutsopoulou K, Metrustry S, Doherty SA, et al. The effect of FTO variation on increased osteoarthritis risk is mediated through body mass index: a mendelian randomisation study. Ann Rheum Dis 2013 Aug 6.

46 Debette S, Wolf C, Lambert JC, et al. Abdominal obesity and lower gray matter volume: a Mendelian randomization study. Neurobiol Aging 2014 Feb;35(2):378-86.

47 Vimaleswaran KS, Berry DJ, Lu C, et al. Causal relationship between obesity and vitamin D status: bi-directional Mendelian randomization analysis of multiple cohorts. PLoS Med 2013;10(2):e1001383.

48 Jokela M, Elovainio M, Keltikangas-Järvinen L, et al. Body mass index and depressive symptoms: instrumental-variables regression with genetic risk score. Genes Brain Behav 2012 Sep 7.

49 Oikonen M, Wendelin-Saarenhovi M, Lyytikäinen LP, et al. Associations between serum uric acid and markers of subclinical atherosclerosis in young adults. The cardiovascular risk in Young Finns study. Atherosclerosis 2012 Aug;223(2):497-503.

50 Islam M, Jafar TH, Wood AR, et al. Multiple genetic variants explain measurable variance in type 2 diabetes-related traits in Pakistanis. Diabetologia 2012 Aug;55(8):2193-204.

51 Mumby HS, Elks CE, Li S, et al. Mendelian Randomisation Study of Childhood BMI and Early Menarche. J Obes 2011;2011:180729.

52 Di Paola R, Marucci A, Fontana A, et al. Role of obesity on all-cause mortality in whites with type 2 diabetes from Italy. Acta Diabetologica 2013 Dec;50(6):971-6.

53 Au Yeung SL, Jiang C, Cheng KK, et al. Moderate alcohol use and cardiovascular disease from Mendelian randomization. PLoS One 2013;8(7):e68054.

54 Au Yeung SL, Jiang CQ, Cheng KK, et al. Evaluation of moderate alcohol use and cognitive function among men using a Mendelian randomization design in the Guangzhou biobank cohort study. Am J Epidemiol 2012 May 15;175(10):1021-8.

55 Wang J, Wang H, Chen Y, Hao P, Zhang Y. Alcohol ingestion and colorectal neoplasia: a meta-analysis based on a Mendelian randomization approach. Colorectal Dis 2011 May;13(5):e71-e78.

56 Boccia S, Hashibe M, Galli P, et al. Aldehyde dehydrogenase 2 and head and neck cancer: a meta-analysis implementing a Mendelian randomization approach. Cancer Epidemiol Biomarkers Prev 2009 Jan;18(1):248-54.

57 Chen L, Davey Smith G, Harbord RM, Lewis SJ. Alcohol intake and blood pressure: a systematic review implementing a Mendelian randomization approach. PLoS Med 2008 Mar 4;5(3):e52.

58 Irons DE, McGue M, Iacono WG, Oetting WS. Mendelian randomization: a novel test of the gateway hypothesis and models of gene-environment interplay. Dev Psychopathol 2007;19(4):1181-95.

59 Humphriss R, Hall A, May M, Zuccolo L, Macleod J. Prenatal alcohol exposure and childhood balance ability: findings from a UK birth cohort study. BMJ Open 2013;3(6).

60 Shaheen SO, Rutterford C, Zuccolo L, et al. Prenatal alcohol exposure and childhood atopic disease: a Mendelian randomization approach. J Allergy Clin Immunol 2014 Jan;133(1):225-32.

61 Lawlor DA, Nordestgaard BG, Benn M, Zuccolo L, Tybjærg-Hansen A, Davey Smith G. Exploring causal associations between alcohol and coronary heart disease risk factors: findings from a Mendelian randomization study in the Copenhagen General Population Study. Eur Heart J 2013 Aug;34(32):2519-28.

62 Zuccolo L, Lewis SJ, Davey Smith G, et al. Prenatal alcohol exposure and offspring cognition and school performance. A 'Mendelian randomization' natural experiment. International Journal of Epidemiology 2013 Oct;42(5):1358-70.

63 Almeida OP, Hankey GJ, Yeap BB, Golledge J, Flicker L. The triangular association of ADH1B genetic polymorphism, alcohol consumption and the risk of depression in older men. Mol Psychiatry 2013 Sep 10.

64 Heidrich J, Wellmann J, Doring A, Illig T, Keil U. Alcohol consumption, alcohol dehydrogenase and risk of coronary heart disease in the MONICA/KORA-Augsburg cohort 1994/1995-2002. European Journal of Cardiovascular Prevention and Rehabilitation 2007 Dec;14(6):769-74.

65 Trummer O, Pilz S, Hoffmann MM, et al. Vitamin D and mortality: a Mendelian randomization study. Clin Chem 2013 May;59(5):793-7.

66 Theodoratou E, Palmer T, Zgaga L, et al. Instrumental variable estimation of the causal effect of plasma 25-hydroxy-vitamin D on colorectal cancer risk: a mendelian randomization analysis. PLoS One 2012;7(6):e37662.

67 Kunutsor SK, Burgess S, Munroe PB, Khan H. Vitamin D and high blood pressure: causal association or epiphenomenon? Eur J Epidemiol 2014 Jan;29(1):1-14.

68 Husemoen LL, Skaaby T, Martinussen T, et al. Investigating the causal effect of vitamin D on serum adiponectin using a mendelian randomization approach. Eur J Clin Nutr 2014 Feb;68(2):189-95.

69 Davies JR, Field S, Randerson-Moor J, et al. An inherited variant in the gene coding for vitamin D-binding protein and survival from cutaneous melanoma: a BioGenoMEL study. Pigment Cell Melanoma Res 2014 Mar;27(2):234-43.

70 Yarwood A, Martin P, Bowes J, et al. Enrichment of vitamin D response elements in RA-associated loci supports a role for vitamin D in the pathogenesis of RA. Genes and Immunity 2013 Jul;14(5):325-9.

71 Skaaby T, Husemoen LL, Martinussen T, et al. Vitamin D status, filaggrin genotype, and cardiovascular risk factors: a Mendelian randomization approach. PLoS One 2013;8(2):e57647.

72 Lewis SJ, Baker I, Davey Smith G. Meta-analysis of vitamin D receptor polymorphisms and pulmonary tuberculosis risk. International Journal of Tuberculosis and Lung Disease 2005 Oct;9(10):1174-7.

73 Bonilla C, Gilbert R, Kemp JP, et al. Using genetic proxies for lifecourse sun exposure to assess the causal relationship of sun exposure with circulating vitamin d and prostate cancer risk. Cancer Epidemiol Biomarkers Prev 2013 Apr;22(4):597-606.

74 Lee HA, Park EA, Cho SJ, et al. Mendelian randomization analysis of the effect of maternal homocysteine during pregnancy, as represented by maternal MTHFR C677T genotype, on birth weight. J Epidemiol 2013 Sep 5;23(5):371-5.

75 Yang Q, Bailey L, Clarke R, et al. Prospective study of methylenetetrahydrofolate reductase (MTHFR) variant C677T and risk of all-cause and cardiovascular disease mortality among 6000 US adults. Am J Clin Nutr 2012 May;95(5):1245-53.

76 Clarke R, Bennett DA, Parish S, et al. Homocysteine and coronary heart disease: meta-analysis of MTHFR case-control studies, avoiding publication bias. PLoS Med 2012 Feb;9(2):e1001177.

77 Marjot T, Yadav S, Hasan N, Bentley P, Sharma P. Genes associated with adult cerebral venous thrombosis. Stroke 2011 Apr;42(4):913-8.

78 Bentley P, Peck G, Smeeth L, Whittaker J, Sharma P. Causal relationship of susceptibility genes to ischemic stroke: comparison to ischemic heart disease and biochemical determinants. PLoS One 2010;5(2):e9136.

79 Nagele P, Zeugswetter B, Wiener C, et al. Influence of methylenetetrahydrofolate reductase gene polymorphisms on homocysteine concentrations after nitrous oxide anesthesia. Anesthesiology 2008 Jul;109(1):36-43.

80 Casas JP, Bautista LE, Smeeth L, Sharma P, Hingorani AD. Homocysteine and stroke: evidence on a causal link from mendelian randomisation. Lancet 2005 Jan 15;365(9455):224-32.

81 Huang T, Ren J, Huang J, Li D. Association of homocysteine with type 2 diabetes: a meta-analysis implementing Mendelian randomization approach. BMC Genomics 2013;14:867.

82 Mamasoula C, Prentice RR, Pierscionek T, et al. Association between C677T polymorphism of methylene tetrahydrofolate reductase and congenital heart disease: meta-analysis of 7697 cases and 13,125 controls. Circ Cardiovasc Genet 2013 Aug;6(4):347-53.

83 Binder AM, Michels KB. The causal effect of red blood cell folate on genome-wide methylation in cord blood: a Mendelian randomization approach. BMC Bioinformatics 2013;14:353.

84 Thuesen BH, Husemoen LLN, Fenger M, Linneberg A. Lack of association between the MTHFR (C677T) polymorphism and atopic disease. Clinical Respiratory Journal 2009 Apr;3(2):102-8.

85 Granell R, Heron J, Lewis S, Davey Smith G, Sterne JAC, Henderson J. The association between mother and child MTHFR C677T polymorphisms, dietary folate intake and childhood atopy in a population-based, longitudinal birth cohort. Clinical and Experimental Allergy 2008 Feb;38(2):320-8.

86 Ference BA, Yoo W, Alesh I, et al. Effect of long-term exposure to lower low-density lipoprotein cholesterol beginning early in life on the risk of coronary heart disease: a Mendelian randomization analysis. J Am Coll Cardiol 2012 Dec 25;60(25):2631-9.

87 Varbo A, Benn M, Tybjærg-Hansen A, Jørgensen AB, Frikke-Schmidt R, Nordestgaard BG. Remnant cholesterol as a causal risk factor for ischemic heart disease. J Am Coll Cardiol 2013 Jan 29;61(4):427-36.

88 Stender S, Frikke-Schmidt R, Benn M, Nordestgaard BG, Tybjærg-Hansen A. Low-density lipoprotein cholesterol and risk of gallstone disease: a Mendelian randomization study and meta-analyses. J Hepatol 2013 Jan;58(1):126-33.

89 Benn M, Tybjærg-Hansen A, Stender S, Frikke-Schmidt R, Nordestgaard BG. Low-density lipoprotein cholesterol and the risk of cancer: a mendelian randomization study. J Natl Cancer Inst 2011 Mar 16;103(6):508-19.

90 Linsel-Nitschke P, Götz A, Erdmann J, et al. Lifelong reduction of LDL-cholesterol related to a common variant in the LDL-receptor gene decreases the risk of coronary artery disease--a Mendelian Randomisation study. PLoS One 2008;3(8):e2986.

91 Niu W, Zhang X, Qi Y. Association of an apolipoprotein E polymorphism with circulating cholesterols and hypertension: a meta-based Mendelian randomization analysis. Hypertens Res 2012 Apr;35(4):434-40.

92 Shah S, Casas JP, Drenos F, et al. Causal relevance of blood lipid fractions in the development of carotid atherosclerosis: Mendelian randomization analysis. Circ Cardiovasc Genet 2013 Feb;6(1):63-72.

93 Qin XY, Tian J, Fang K, et al. [Mendelian randomization study of the relationship between high-density lipoprotein cholesterol and age-related macular degeneration]. Beijing Da Xue Xue Bao 2012 Jun 18;44(3):407-11.

94 Voight BF, Peloso GM, Orho-Melander M, et al. Plasma HDL cholesterol and risk of myocardial infarction: a mendelian randomisation study. Lancet 2012 Aug 11;380(9841):572-80.

95 Haase CL, Tybjærg-Hansen A, Qayyum AA, Schou J, Nordestgaard BG, Frikke-Schmidt R. LCAT, HDL cholesterol and ischemic cardiovascular disease: a Mendelian randomization study of HDL cholesterol in 54,500 individuals. J Clin Endocrinol Metab 2012 Feb;97(2):E248-E256.

96 Chmielewski M, Verduijn M, Drechsler C, et al. Low cholesterol in dialysis patients--causal factor for mortality or an effect of confounding? Nephrol Dial Transplant 2011 Oct;26(10):3325-31.

97 Trompet S, Jukema JW, Katan MB, et al. Apolipoprotein e genotype, plasma cholesterol, and cancer: a Mendelian randomization study. Am J Epidemiol 2009 Dec 1;170(11):1415-21.

98 Giltay EJ, van Reedt Dortland AK, Nissinen A, et al. Serum cholesterol, apolipoprotein E genotype and depressive symptoms in elderly European men: the FINE study. J Affect Disord 2009 Jun;115(3):471-7.

99 Jørgensen AB, Frikke-Schmidt R, West AS, Grande P, Nordestgaard BG, Tybjærg-Hansen A. Genetically elevated non-fasting triglycerides and calculated remnant cholesterol as causal risk factors for myocardial infarction. Eur Heart J 2013 Jun;34(24):1826-33.

100 Yao WM, Zhang HF, Zhu ZY, et al. Genetically elevated levels of circulating triglycerides and brachial-ankle pulse wave velocity in a Chinese population. J Hum Hypertens 2013 Apr;27(4):265-70.

101 Sarwar N, Sandhu MS, Ricketts SL, et al. Triglyceride-mediated pathways and coronary disease: collaborative analysis of 101 studies. Lancet 2010 May 8;375(9726):1634-9.

102 De Silva NM, Freathy RM, Palmer TM, et al. Mendelian randomization studies do not support a role for raised circulating triglyceride levels influencing type 2 diabetes, glucose levels, or insulin resistance. Diabetes 2011 Mar;60(3):1008-18.

103 Thanassoulis G, Campbell CY, Owens DS, et al. Genetic associations with valvular calcification and aortic stenosis. N Engl J Med 2013 Feb 7;368(6):503-12.

104 Kamstrup PR, Tybjærg-Hansen A, Nordestgaard BG. Genetic evidence that lipoprotein(a) associates with atherosclerotic stenosis rather than venous thrombosis. Arterioscler Thromb Vasc Biol 2012 Jul;32(7):1732-41.

105 Kivimäki M, Magnussen CG, Juonala M, et al. Conventional and Mendelian randomization analyses suggest no association between lipoprotein(a) and early atherosclerosis: the Young Finns Study. Int J Epidemiol 2011 Apr;40(2):470-8.

106 Kamstrup PR, Tybjærg-Hansen A, Steffensen R, Nordestgaard BG. Genetically elevated lipoprotein(a) and increased risk of myocardial infarction. JAMA 2009 Jun 10;301(22):2331-9.

107 Kamstrup PR, Nordestgaard BG. Lipoprotein(a) concentrations, isoform size, and risk of type 2 diabetes: a Mendelian randomisation study. The Lancet Diabetes & Endocrinology 2013 Nov;1(3):220-7.

108 Kamstrup PR, Tybjærg-Hansen A, Nordestgaard BG. Elevated lipoprotein(a) and risk of aortic valve stenosis in the general population. J Am Coll Cardiol 2014 Feb 11;63(5):470-7.

109 Ye Z, Haycock PC, Gurdasani D, et al. The association between circulating lipoprotein(a) and type 2 diabetes: is it causal? Diabetes 2014 Jan;63(1):332-42.

110 Casas JP, Ninio E, Panayiotou A, et al. PLA2G7 Genotype, lipoprotein-associated phospholipase A2 activity, and coronary heart disease risk in 10 494 cases and 15 624 controls of european ancestry. Circulation 2010 Jun 1;121(21):2284-93.

111 Koshy B, Miyashita A, St.Jean P, et al. Genetic deficiency of plasma lipoprotein-associated phospholipase A 2 (PLA2G7 V297F null mutation) and risk of Alzheimer's disease in Japan. Journal of Alzheimer's Disease 2010;21(3):775-80.

112 Holmes MV, Simon T, Exeter HJ, et al. Secretory phospholipase A(2)-IIA and cardiovascular disease: a mendelian randomization study. J Am Coll Cardiol 2013 Nov 19;62(21):1966-76.

113 Dai X, Yuan J, Yao P, et al. Association between serum uric acid and the metabolic syndrome among a middle- and old-age Chinese population. Eur J Epidemiol 2013 Aug;28(8):669-76.

114 Parsa A, Brown E, Weir MR, et al. Genotype-based changes in serum uric acid affect blood pressure. Kidney Int 2012 Mar;81(5):502-7.

115 Hughes K, Flynn T, de Zoysa J, Dalbeth N, Merriman TR. Mendelian randomization analysis associates increased serum urate, due to genetic variation in uric acid transporters, with improved renal function. Kidney Int 2014 Feb;85(2):344-51.

116 Pfister R, Barnes D, Luben R, et al. No evidence for a causal link between uric acid and type 2 diabetes: a Mendelian randomisation approach. Diabetologia 2011 Oct;54(10):2561-9.

117 Niu W, Liu Y, Qi Y, Wu Z, Zhu D, Jin W. Association of interleukin-6 circulating levels with coronary artery disease: a meta-analysis implementing mendelian randomization approach. Int J Cardiol 2012 May 31;157(2):243-52.

118 van Durme YM, Lahousse L, Verhamme KM, et al. Mendelian randomization study of interleukin-6 in chronic obstructive pulmonary disease. Respiration 2011;82(6):530-8.

119 Harrison SC, Smith AJ, Jones GT, et al. Interleukin-6 receptor pathways in abdominal aortic aneurysm. Eur Heart J 2013 Dec;34(48):3707-16.

120 Hingorani AD, Casas JP. The interleukin-6 receptor as a target for prevention of coronary heart disease: a mendelian randomisation analysis. Lancet 2012 Mar 31;379(9822):1214-24.

121 Jensen MK, Bartz TM, Djousse L, et al. Genetically elevated fetuin-A levels, fasting glucose levels, and risk of type 2 diabetes: the cardiovascular health study. Diabetes Care 2013 Oct;36(10):3121-7.

122 Verduijn M, Prein RA, Stenvinkel P, et al. Is fetuin-A a mortality risk factor in dialysis patients or a mere risk marker? A Mendelian randomization approach. Nephrol Dial Transplant 2011 Jan;26(1):239-45.

123 Fisher E, Stefan N, Saar K, et al. Association of AHSG gene polymorphisms with fetuin-A plasma levels and cardiovascular diseases in the EPIC-Potsdam study. Circ Cardiovasc Genet 2009 Dec;2(6):607-13.

124 Yaghootkar H, Lamina C, Scott RA, et al. Mendelian randomization studies do not support a causal role for reduced circulating adiponectin levels in insulin resistance and type 2 diabetes. Diabetes 2013 Oct;62(10):3589-98.

125 Mente A, Meyre D, Lanktree MB, et al. Causal relationship between adiponectin and metabolic traits: a Mendelian randomization study in a multiethnic population. PLoS One 2013;8(6):e66808.

126 Gao H, Fall T, van Dam RM, et al. Evidence of a causal relationship between adiponectin levels and insulin sensitivity: a Mendelian randomization study. Diabetes 2013 Apr;62(4):1338-44.

127 Menzaghi C, De Cosmo S, Copetti M, et al. Relationship between ADIPOQ gene, circulating high molecular weight adiponectin and albuminuria in individuals with normal kidney function: Evidence from a family-based study. Diabetologia 2011 Apr;54(4):812-8.

128 Klovaite J, Nordestgaard BG, Tybjærg-Hansen A, Benn M. Elevated fibrinogen levels are associated with risk of pulmonary embolism, but not with deep venous thrombosis. Am J Respir Crit Care Med 2013 Feb 1;187(3):286-93.

129 Keavney B, Danesh J, Parish S, et al. Fibrinogen and coronary heart disease: test of causality by 'Mendelian randomization'. Int J Epidemiol 2006 Aug;35(4):935-43.

130 Davey Smith G, Harbord R, Milton J, Ebrahim S, Sterne JAC. Does elevated plasma fibrinogen increase the risk of coronary heart disease? Evidence from a meta-analysis of genetic association studies. Arteriosclerosis, Thrombosis, and Vascular Biology 2005 Oct;25(10):2228-33.

131 Bonilla C, Lawlor DA, Ben-Shlomo Y, et al. Maternal and offspring fasting glucose and type 2 diabetes-associated genetic variants and cognitive function at age 8: a Mendelian randomization study in the Avon Longitudinal Study of Parents and Children. BMC Med Genet 2012;13:90.

132 Rasmussen-Torvik LJ, Li M, Kao WH, et al. Association of a fasting glucose genetic risk score with subclinical atherosclerosis: The Atherosclerosis Risk in Communities (ARIC) study. Diabetes 2011 Jan;60(1):331-5.

133 Trombetta M, Bonetti S, Boselli ML, et al. PPARG2 Pro12Ala and ADAMTS9 rs4607103 as "insulin resistance loci" and "insulin secretion loci" in Italian individuals. The GENFIEV study and the Verona Newly Diagnosed Type 2 Diabetes Study (VNDS) 4. Acta Diabetol 2013 Jun;50(3):401-8.

134 Song Y, Yeung E, Liu A, et al. Pancreatic beta-cell function and type 2 diabetes risk: quantify the causal effect using a Mendelian randomization approach based on meta-analyses. Hum Mol Genet 2012 Nov 15;21(22):5010-8.

135 Benn M, Tybjærg-Hansen A, McCarthy MI, Jensen GB, Grande P, Nordestgaard BG. Nonfasting glucose, ischemic heart disease, and myocardial infarction: a Mendelian randomization study. J Am Coll Cardiol 2012 Jun 19;59(25):2356-65.

136 Ioannidis A, Ikonomi E, Dimou NL, Douma L, Bagos PG. Polymorphisms of the insulin receptor and the insulin receptor substrates genes in polycystic ovary syndrome: a Mendelian randomization meta-analysis. Mol Genet Metab 2010 Feb;99(2):174-83.

137 Pierce BL, Ahsan H. Genetic susceptibility to type 2 diabetes is associated with reduced prostate cancer risk. Human Heredity 2010 Mar;69(3):193-201.

138 Almon R, Álvarez-León EE, Serra-Majem L. Association of the European lactase persistence variant (LCT-13910 C>T polymorphism) with obesity in the Canary Islands. PLoS One 2012;7(8):e43978.

139 Almon R, Álvarez-León EE, Engfeldt P, Serra-Majem L, Magnuson A, Nilsson TK. Associations between lactase persistence and the metabolic syndrome in a cross-sectional study in the Canary Islands. Eur J Nutr 2010 Apr;49(3):141-6.

140 Travis RC, Appleby PN, Siddiq A, et al. Genetic variation in the lactase gene, dairy product intake and risk for prostate cancer in the European prospective investigation into cancer and nutrition. International Journal of Cancer 2013 Apr 15;132(8):1901-10.

141 Pichler I, Del Greco MF, Gögele M, et al. Serum iron levels and the risk of Parkinson disease: a Mendelian randomization study. PLoS Med 2013;10(6):e1001462.

142 Alwan NA, Lawlor DA, McArdle HJ, Greenwood DC, Cade JE. Exploring the relationship between maternal iron status and offspring's blood pressure and adiposity: a Mendelian randomization study. Clin Epidemiol 2012;4:193-200.

143 Gan W, Guan Y, Wu Q, et al. Association of TMPRSS6 polymorphisms with ferritin, hemoglobin, and type 2 diabetes risk in a Chinese Han population. Am J Clin Nutr 2012 Mar;95(3):626-32.

144 Stender S, Frikke-Schmidt R, Nordestgaard BG, Tybjærg-Hansen A. Extreme bilirubin levels as a causal risk factor for symptomatic gallstone disease. JAMA Intern Med 2013 Jul 8;173(13):1222-8.

145 Stender S, Frikke-Schmidt R, Nordestgaard BG, Grande P, Tybjærg-Hansen A. Genetically elevated bilirubin and risk of ischaemic heart disease: three Mendelian randomization studies and a meta-analysis. J Intern Med 2013 Jan;273(1):59-68.

146 McArdle PF, Whitcomb BW, Tanner K, Mitchell BD, Shuldiner AR, Parsa A. Association between bilirubin and cardiovascular disease risk factors: using Mendelian randomization to assess causal inference. BMC Cardiovasc Disord 2012;12:16.

147 Perry JR, Weedon MN, Langenberg C, et al. Genetic evidence that raised sex hormone binding globulin (SHBG) levels reduce the risk of type 2 diabetes. Hum Mol Genet 2010 Feb 1;19(3):535-44.

148 Ding EL, Song Y, Manson JE, et al. Sex hormone-binding globulin and risk of type 2 diabetes in women and men. N Engl J Med 2009 Sep 17;361(12):1152-63.

149 Stegeman BH, Helmerhorst FM, Vos HL, Rosendaal FR, Van Hylckama Vlieg A. Sex hormone-binding globulin levels are not causally related to venous thrombosis risk in women not using hormonal contraceptives. Journal of Thrombosis and Haemostasis 2012 Oct;10(10):2061-7.

150 Haring R, Teumer A, Völker U, et al. Mendelian randomization suggests non-causal associations of testosterone with cardiometabolic risk factors and mortality. Andrology 2013 Jan;1(1):17-23.

151 Zhao J, Jiang C, Lam TH, et al. Genetically predicted testosterone and cardiovascular risk factors in men: a Mendelian randomization analysis in the Guangzhou Biobank Cohort Study. Int J Epidemiol 2014 Feb;43(1):140-8.

152 Attermann J, Obel C, Bilenberg N, Nordenbæk CM, Skytthe A, Olsen J. Traits of ADHD and autism in girls with a twin brother: a Mendelian randomization study. Eur Child Adolesc Psychiatry 2012 Sep;21(9):503-9.

153 Guessous I, Dobrinas M, Kutalik Z, et al. Caffeine intake and CYP1A2 variants associated with high caffeine intake protect non-smokers from hypertension. Hum Mol Genet 2012 Jul 15;21(14):3283-92.

154 Bech BH, Autrup H, Nohr EA, Henriksen TB, Olsen J. Stillbirth and slow metabolizers of caffeine: comparison by genotypes. Int J Epidemiol 2006 Aug;35(4):948-53.

155 Bonilla C, Lawlor DA, Taylor AE, et al. Vitamin B-12 status during pregnancy and child's IQ at age 8: a Mendelian randomization study in the Avon longitudinal study of parents and children. PLoS One 2012;7(12):e51084.

156 Collin SM, Metcalfe C, Palmer TM, et al. The causal roles of vitamin B(12) and transcobalamin in prostate cancer: can Mendelian randomization analysis provide definitive answers? Int J Mol Epidemiol Genet 2011;2(4):316-27.

157 Bjørngaard JH, Gunnell D, Elvestad MB, et al. The causal role of smoking in anxiety and depression: a Mendelian randomization analysis of the HUNT study. Psychol Med 2013 Apr;43(4):711-9.

158 Lewis SJ, Araya R, Davey Smith G, et al. Smoking is associated with, but does not cause, depressed mood in pregnancy--a mendelian randomization study. PLoS One 2011;6(7):e21689.

159 Scott JA, Berkley JA, Mwangi I, et al. Relation between falciparum malaria and bacteraemia in Kenyan children: a population-based, case-control study and a longitudinal study. Lancet 2011 Oct 8;378(9799):1316-23.

160 Kang H, Kreuels B, Adjei O, Krumkamp R, May J, Small DS. The causal effect of malaria on stunting: a Mendelian randomization and matching approach. International Journal of Epidemiology 2013 Oct;42(5):1390-8.

161 Frayling TM, Rafiq S, Murray A, et al. An interleukin-18 polymorphism is associated with reduced serum concentrations and better physical functioning in older people. J Gerontol A Biol Sci Med Sci 2007 Jan;62(1):73-8.

162 Herder C, Klopp N, Baumert J, et al. Effect of macrophage migration inhibitory factor (MIF) gene variants and MIF serum concentrations on the risk of type 2 diabetes: results from the MONICA/KORA Augsburg Case-Cohort Study, 1984-2002. Diabetologia 2008 Feb;51(2):276-84.

163 Bouthoorn SH, van Lenthe FJ, Kiefte-de Jong JC, et al. Genetic taste blindness to bitter and body composition in childhood: a Mendelian randomization design. Int J Obes (Lond) 2014 Jul;38(7):1005-10.

164 You NC, Chen BH, Song Y, et al. A prospective study of leukocyte telomere length and risk of type 2 diabetes in postmenopausal women. Diabetes 2012 Nov;61(11):2998-3004.

165 Breitling LP, Koenig W, Fischer M, et al. Type II secretory phospholipase A2 and prognosis in patients with stable coronary heart disease: mendelian randomization study. PLoS One 2011;6(7):e22318.

166 Conen D, Vollenweider P, Rousson V, et al. Use of a Mendelian randomization approach to assess the causal relation of gamma-Glutamyltransferase with blood pressure and serum insulin levels. Am J Epidemiol 2010 Dec 15;172(12):1431-41.

167 Kröger J, Zietemann V, Enzenbach C, et al. Erythrocyte membrane phospholipid fatty acids, desaturase activity, and dietary fatty acids in relation to risk of type 2 diabetes in the European Prospective Investigation into Cancer and Nutrition (EPIC)-Potsdam Study. Am J Clin Nutr 2011 Jan;93(1):127-42.

168 Love-Gregory L, Sherva R, Schappe T, et al. Common CD36 SNPs reduce protein expression and may contribute to a protective atherogenic profile. Hum Mol Genet 2011 Jan 1;20(1):193-201.

169 Wu Y, Li H, Loos RJ, et al. RBP4 variants are significantly associated with plasma RBP4 levels and hypertriglyceridemia risk in Chinese Hans. J Lipid Res 2009 Jul;50(7):1479-86.

170 Sharma NK, Gupta A, Prabhakar S, et al. Association between CFH Y402H polymorphism and age related macular degeneration in North Indian cohort. PLoS One 2013;8(7):e70193.

171 Aramini B, Kim C, Diangelo S, et al. Donor surfactant protein D (SP-D) polymorphisms are associated with lung transplant outcome. American Journal of Transplantation 2013 Aug;13(8):2130-6.

172 Tian Q, Jia J, Ling S, Liu Y, Yang S, Shao Z. A causal role for circulating miR-34b in osteosarcoma. Eur J Surg Oncol 2014 Jan;40(1):67-72.

173 Oelsner EC, Pottinger TD, Burkart KM, et al. Adhesion molecules, endothelin-1 and lung function in seven population-based cohorts. Biomarkers 2013 May;18(3):196-203.

174 Cruchaga C, Kauwe JS, Nowotny P, et al. Cerebrospinal fluid APOE levels: an endophenotype for genetic studies for Alzheimer's disease. Hum Mol Genet 2012 Oct 15;21(20):4558-71.

175 Pfister R, Sharp S, Luben R, et al. Mendelian randomization study of B-type natriuretic peptide and type 2 diabetes: evidence of causal association from population studies. PLoS Med 2011 Oct;8(10):e1001112.

176 Perry JR, Ferrucci L, Bandinelli S, et al. Circulating beta-carotene levels and type 2 diabetes-cause or effect? Diabetologia 2009 Oct;52(10):2117-21.

177 Pierce BL, Tong L, Argos M, et al. Arsenic metabolism efficiency has a causal role in arsenic toxicity: Mendelian randomization and gene-environment interaction. International Journal of Epidemiology 2013 Dec;42(6):1862-71.

178 Adamsson Eryd S, Sjögren M, Smith JG, et al. Ceruloplasmin and atrial fibrillation: evidence of causality from a population-based Mendelian randomization study. J Intern Med 2014 Feb;275(2):164-71.

179 Rice NE, Bandinelli S, Corsi AM, et al. The paraoxonase (PON1) Q192R polymorphism is not associated with poor health status or depression in the ELSA or INCHIANTI studies. Int J Epidemiol 2009 Oct;38(5):1374-9.
